# Supplementary material for: MUC13-miRNA-4647 axis in colorectal cancer: Prospects to identifications of risk factors and clinical outcomes
Source: PubMed Central journal article supplement — Oncol Lett. 2022 Dec 30;25(2):72. doi: 10.3892/ol.2022.13658 (PMC9843305; doi:10.3892/ol.2022.13658), 2022-12-30
Supplement: Supplementary_Data2.pdf [file Supplementary_Data2.pdf]

Table S1. List of validated TaqMan assays, reference genes, miRNA mimics and siRNA assays to be used as reference genes for data normalization.

| Genes                                  | ID           | Assay ID                                        |
|----------------------------------------|--------------|-------------------------------------------------|
| Reverse transcription-quantitative PCR |              |                                                 |
| miR-4647                               | MI0017274    | 479880_mir - ThermoFisher Scientific, Inc.      |
| MUC13                                  | 56667        | Hs00217230 - ThermoFisher Scientific, Inc.      |
| miRNA mimics                           |              |                                                 |
| miR-4647                               | MIMAT0019709 | 4464066 - ThermoFisher Scientific, Inc.         |
| miRNA mimics negative control          |              | HMC0003 - Sigma Aldrich; Merck KGaA             |
| siRNA                                  |              |                                                 |
| MUC13                                  | 56667        | am16708; Ambion; ThermoFisher Scientific, Inc.  |
| control siRNA #1                       |              | 464058; Ambion; ThermoFisher Scientific, Inc.   |
| RNU48                                  | NR_002745    | 001006; ThermoFisher Scientific, Inc.           |
| ACTB                                   |              | IDHs99999903_m1 - ThermoFisher Scientific, Inc. |

miR, microRNA; siRNA, small interfering RNA.

Table SII. Characteristics of histological sections and microscopic image fields, representing each colorectal tumor sample used for estimating the parameters.

| Quantitative parameter                           | Microscope objective used | Sections sampled per patient for quantification | Image fields sampled per patient | Number of counting events per patient                     |
|--------------------------------------------------|---------------------------|-------------------------------------------------|----------------------------------|-----------------------------------------------------------|
| AA (mucin 13, colorectal cancer and its stroma)* | x40                       | 1                                               | 8                                | 259 intersections on average with mucin 13 positive areas |
| AA (mucin 13, adjacent peritumoral mucosa)*      | x40                       | 1                                               | 8                                | 40 intersections on average with mucin 13 positive areas  |

\*the area fraction  $A_A$  (area per area, dimensionless ratio) of MUC13 within the intestine wall.

Table SIII. The area fraction of MUC13  $A_A$  (area per area, dimensionless ratio; on the base of immunohistochemical detection) within the intestine wall of colorectal tumor samples. Quantitative histopathology was done using stereological methods and the Ellipse software.

| Patients no. | Tumor tissue                                  | Adjacent non-tumoral mucose                   |
|--------------|-----------------------------------------------|-----------------------------------------------|
|              | AA-Area fraction of MUC13 (area per area) (%) | AA-Area fraction of MUC13 (area per area) (%) |
| 1            | 33.96                                         | 4.04                                          |
| 2            | 35.98                                         | 2.53                                          |
| 3            | 30.18                                         |                                               |
| 4            | 24.62                                         | 3.28                                          |
| 5            | 45.45                                         |                                               |
| 6            | 39.77                                         | 12.12                                         |
| 7            | 35.61                                         |                                               |
| 8            | 17.42                                         |                                               |
| 9            | 28.79                                         | 6.44                                          |
| 10           | 38.26                                         |                                               |
| 11           | 50.38                                         | 2.78                                          |
| 12           | 33.84                                         |                                               |
| 13           | 40.28                                         |                                               |
| 14           | 26.77                                         | 4.55                                          |
| 15           | 23.36                                         |                                               |
| 16           | 44.82                                         | 0.63                                          |
| 17           | 31.69                                         |                                               |
| 18           | 48.86                                         | 4.92                                          |
| 19           | 31.44                                         | 1.39                                          |
| 20           | 20.83                                         |                                               |
| 21           | 50.00                                         | 4.17                                          |
| 22           | 36.49                                         | 7.95                                          |
| 23           | 17.93                                         |                                               |
| 24           | 19.95                                         | 7.32                                          |
| 25           | 26.39                                         |                                               |
| 26           | 12.88                                         | 4.29                                          |
| 27           | 28.28                                         | 0.51                                          |
| 28           | 33.21                                         | 4.80                                          |
| 29           | 29.17                                         |                                               |
| 30           | 39.27                                         | 5.30                                          |
| 31           | 30.30                                         |                                               |
| 32           | 36.49                                         |                                               |
| 33           | 39.52                                         | 5.68                                          |
| 34           | 10.61                                         | 3.41                                          |
| 35           | 38.01                                         | 11.36                                         |
| 36           | 17.55                                         |                                               |
| 37           | 35.80                                         | 5.05                                          |
| 38           | 42.55                                         | 15.78                                         |
| 39           | 36.99                                         | 2.15                                          |
| 40           | 17.17                                         | 2.65                                          |
| 41           | 32.07                                         | 6.94                                          |
| 42           | 33.59                                         | 0.13                                          |
| 43           | 46.72                                         | 5.93                                          |
| 44           | 40.03                                         |                                               |
